# Supplementary material
Source: PubMed Central journal article supplement (PMC3981911)
Supplement: NIHMS562152-supplement-1.pdf [file NIHMS562152-supplement-1.pdf]

Novel *ex vivo* approaches distinguish effective and ineffective single agents for reversing HIV-1 latency *in vivo*

C. Korin Bullen†, Gregory M. Laird†, Christine M. Durand, Janet D. Siliciano, Robert F. Siliciano\*

†These authors contributed equally to this work

**Supplementary Table 1. Characteristics of HIV-1 infected study participants.**

| Pt. ID | Age | Sex | Race | Duration of infection (months) | ART regimen          | Time on ART (months) | Time on Suppressive ART (months) | Peak reported viral load (copies mL <sup>-1</sup> ) |
|--------|-----|-----|------|--------------------------------|----------------------|----------------------|----------------------------------|-----------------------------------------------------|
| S1     | 53  | M   | W    | 307                            | DRV/r, RAL           | 152                  | 20                               | 710,579                                             |
| S2     | 48  | M   | W    | 229                            | ABC, FTC, FPV/r      | 226                  | 103                              | 30,000                                              |
| S3     | 78  | M   | W    | 101                            | FTC, TDF, EFV        | 68                   | 57                               | 750,000                                             |
| S4     | 31  | M   | W    | 100                            | FTC, TDF, EFV        | 78                   | 65                               | 74,934                                              |
| S5     | 52  | M   | W    | 208                            | ETR, DRV/r           | 200                  | 120                              | 750,000                                             |
| S6     | 47  | M   | W    | 50                             | FTC, TDF, ATV/r      | 38                   | 31                               | 64,137                                              |
| S7     | 52  | M   | B    | 216                            | EFV, DRV/r, RAL      | 192                  | 16                               | —                                                   |
| S8     | 57  | M   | B    | 88                             | FTC, TDF, EFV        | 87                   | 54                               | 100,000                                             |
| S9     | 53  | M   | B    | 153                            | FTC, TDF, LPV/r      | 144                  | 66                               | 69,956                                              |
| S10    | 67  | M   | W    | 220                            | ABC, 3TC, EFV        | 202                  | 92                               | —                                                   |
| S11    | 49  | M   | B    | 143                            | FTC, TDF, EFV        | 120                  | 96                               | —                                                   |
| S12    | 36  | M   | B    | 60                             | FTC, TDF, NVP        | 60                   | 60                               | —                                                   |
| S13    | 60  | M   | B    | 143                            | FTC, TDF, EFV        | 142                  | 132                              | —                                                   |
| S14    | 49  | M   | B    | 194                            | FTC, TDF, RPV        | 92                   | 20                               | —                                                   |
| S15    | 51  | M   | B    | 264                            | FTC, TDF, RAL        | 128                  | 18                               | —                                                   |
| S16    | 52  | M   | B    | 235                            | FTC, TDF, EFV        | 192                  | 80                               | —                                                   |
| S17    | 55  | F   | B    | 296                            | 3TC, ETR, RAL        | 202                  | 108                              | 68,712                                              |
| S18    | 50  | M   | B    | 103                            | 3TC, TDF, DRV/r      | >36                  | 18                               | 27,817                                              |
| S19    | 38  | F   | B    | 139                            | DRV/r, RAL, MVC      | 48                   | 24                               | —                                                   |
| S20    | 47  | M   | B    | 234                            | 3TC, TDF, EVG/c      | 216                  | 24                               | 100,000                                             |
| S21    | 45  | M   | W    | 79                             | FTC, TDF, EFV        | 72                   | 60                               | 60,000                                              |
| S22    | 55  | F   | B    | 66                             | ABC, FTC, EFV        | 70                   | 64                               | 39,305                                              |
| S23    | 54  | F   | B    | 180                            | 3TC, TDF, EVG/c      | 96                   | 9                                | —                                                   |
| S24    | 43  | M   | B    | 44                             | FTC, TDF, EFV        | >12                  | 12                               | —                                                   |
| S25    | 82  | M   | W    | 230                            | FTC, TDF, EFV        | >84                  | 84                               | —                                                   |
| S26    | 45  | M   | W    | 83                             | FTC, TDF, EFV        | 82                   | 80                               | 60,700                                              |
| S27    | 41  | M   | B    | 228                            | FTC, TDF, EFV        | >120                 | 47                               | >100,000                                            |
| S28    | 47  | M   | B    | 276                            | 3TC, AZT, DRV/r, RAL | >120                 | 24                               | 584,000                                             |
| S29    | 59  | M   | B    | 218                            | ETR, DRV/r, RAL      | >200                 | 84                               | —                                                   |
| S30    | 66  | M   | B    | 244                            | FTC, TDF, EFV        | >189                 | 182                              | —                                                   |
| S31    | 59  | M   | B    | 96                             | ABC, 3TC, DRV/r      | 91                   | 51                               | —                                                   |

Abbreviations: abacavir (ABC), emtricitabine (FTC), lamivudine (3TC), tenofovir (TDF), efavirenz (EFV), etravirine (ETR), nevirapine (NVP), atazanavir boosted with ritonavir (ATV/r), darunavir boosted with ritonavir (DRV/r), fosamprenavir boosted with ritonavir (FPV/r), lopinavir boosted with ritonavir (LPV/r), elvitegravir boosted with cobicistat (EVG/c), raltegravir (RAL), maraviroc (MVC)

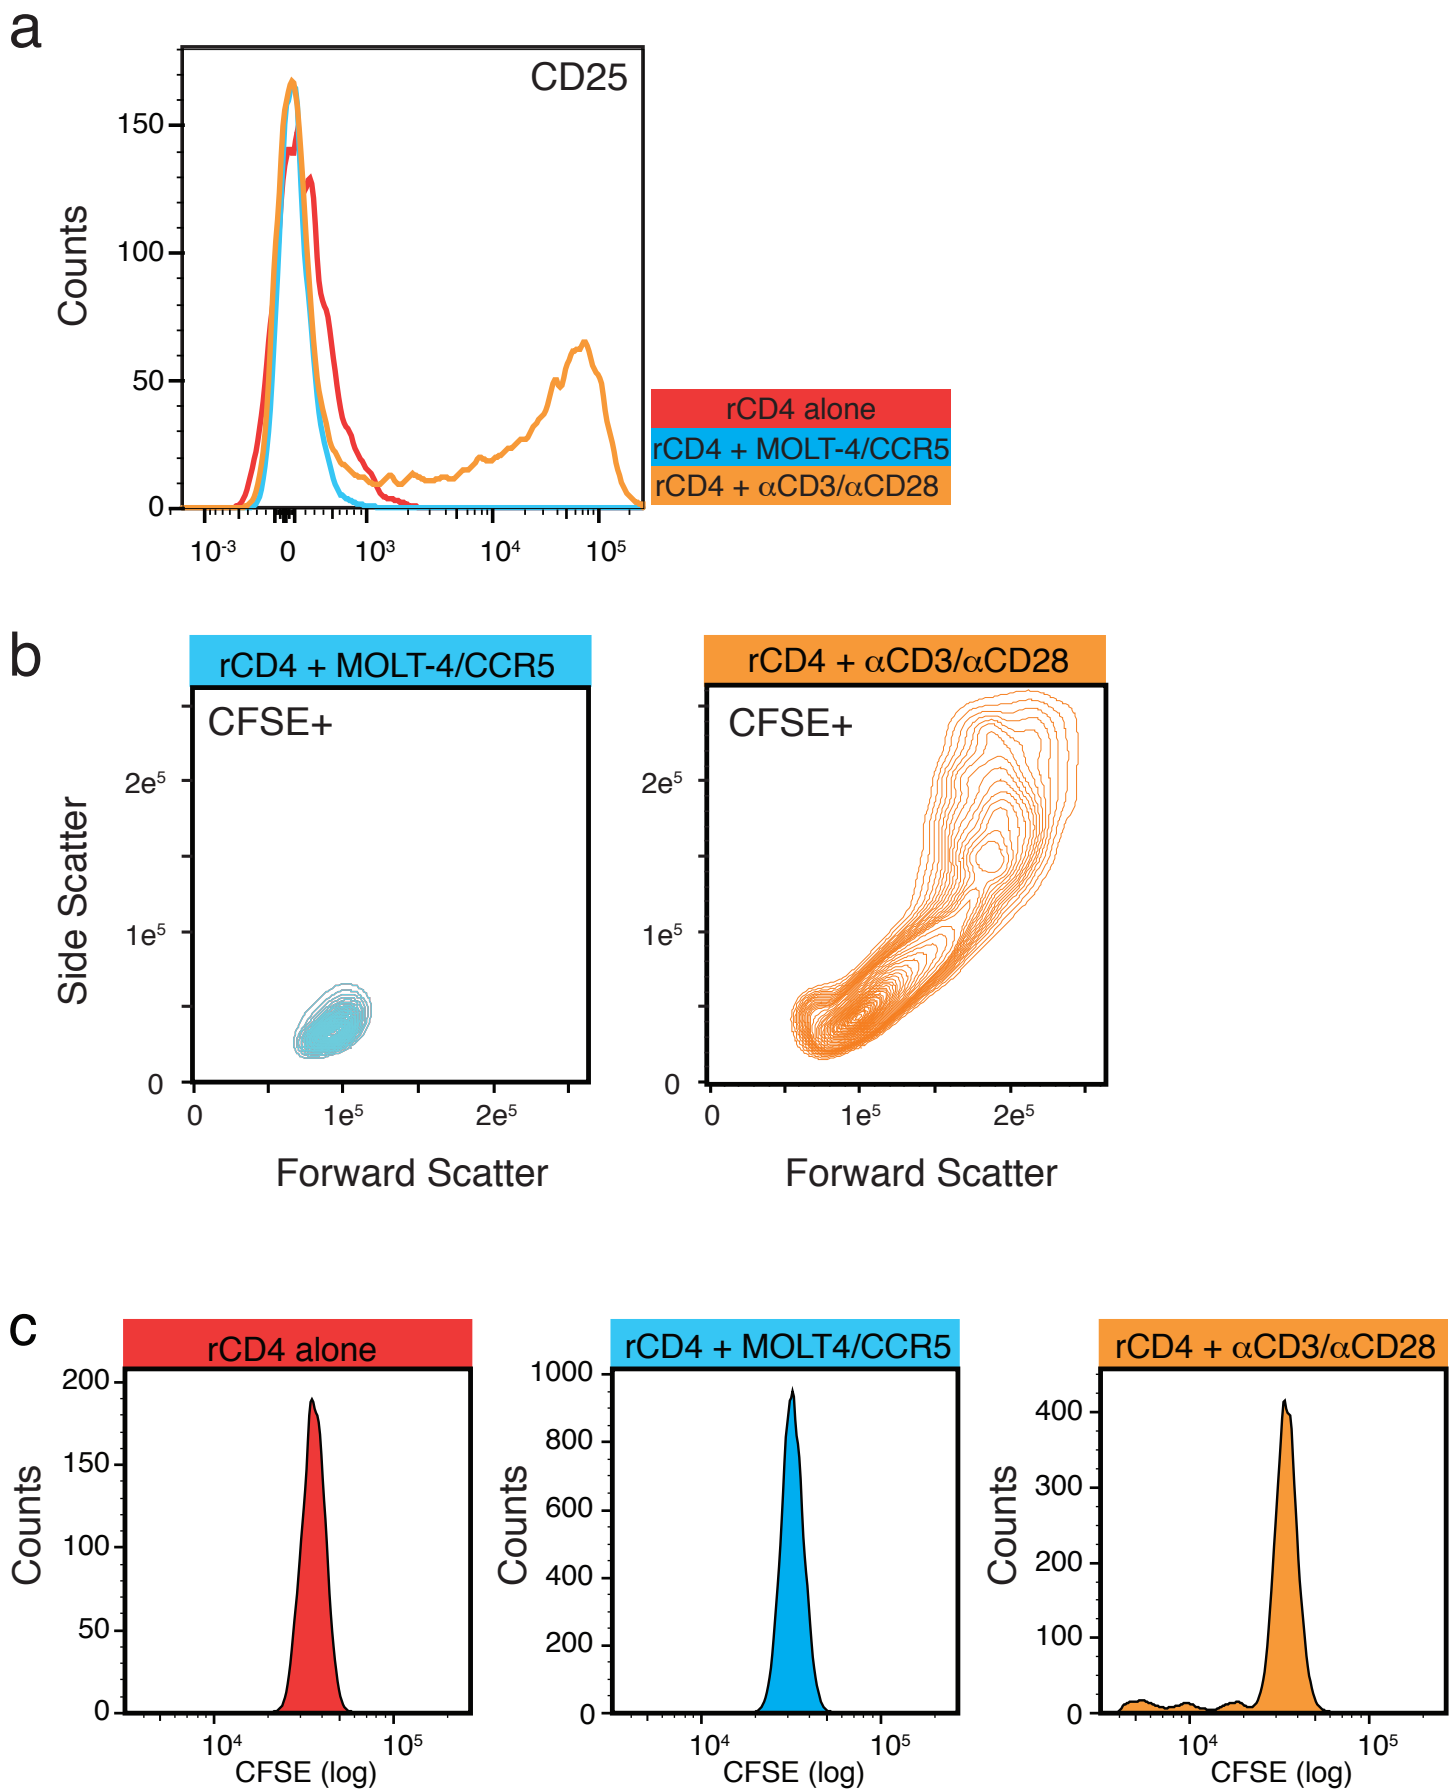

**Supplementary Figure 1. MOLT-4/CCR5 cells do not induce allogeneic activation of rCD4s.** rCD4s were isolated from an uninfected individual and stained with CFSE. Cells were then cultured alone, co-cultured with MOLT-4/CCR5 cells, or stimulated with anti-CD3 and anti-CD28 for 7 days. Cells were analyzed by flow cytometry for (a) CD25 expression, (b) morphology defined by forward scatter and side scatter, and (c) CFSE dilution indicative of activation-induced cell division.

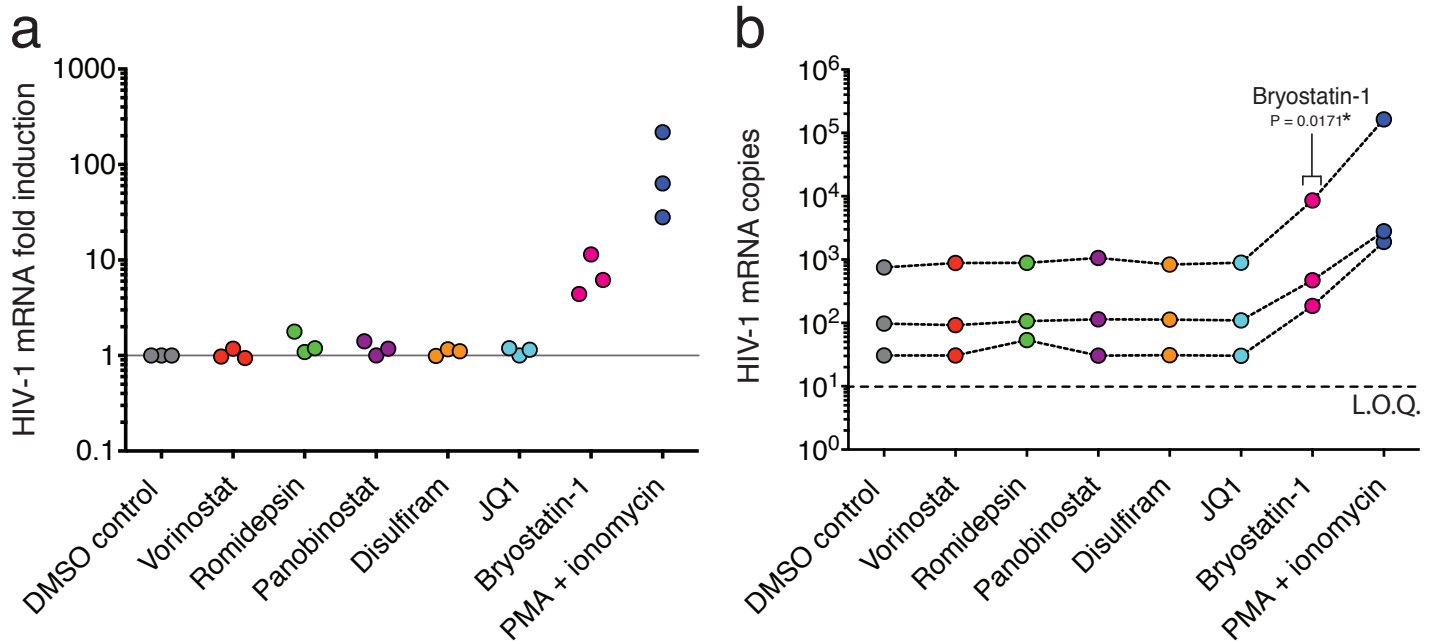

**Supplementary Figure 2. Short treatment with LRAs does not consistently induce HIV-1 mRNA production in cells from HIV-1 infected individuals on ART.** Five million rCD4s from infected individuals on ART were cultured in triplicate with LRAs for 6 h. Intracellular HIV-1 mRNA from each replicate was measured using RT-qPCR. Mean effect of the LRA in each patient, depicted by individual dots, is presented as (a) fold change relative to DMSO control (mean  $\pm$  s.e.m.) and (b) copies of HIV-1 mRNA per million rCD4 equivalents. Statistical significance was determined using a paired t-test. Lines connect data points from individual subjects.

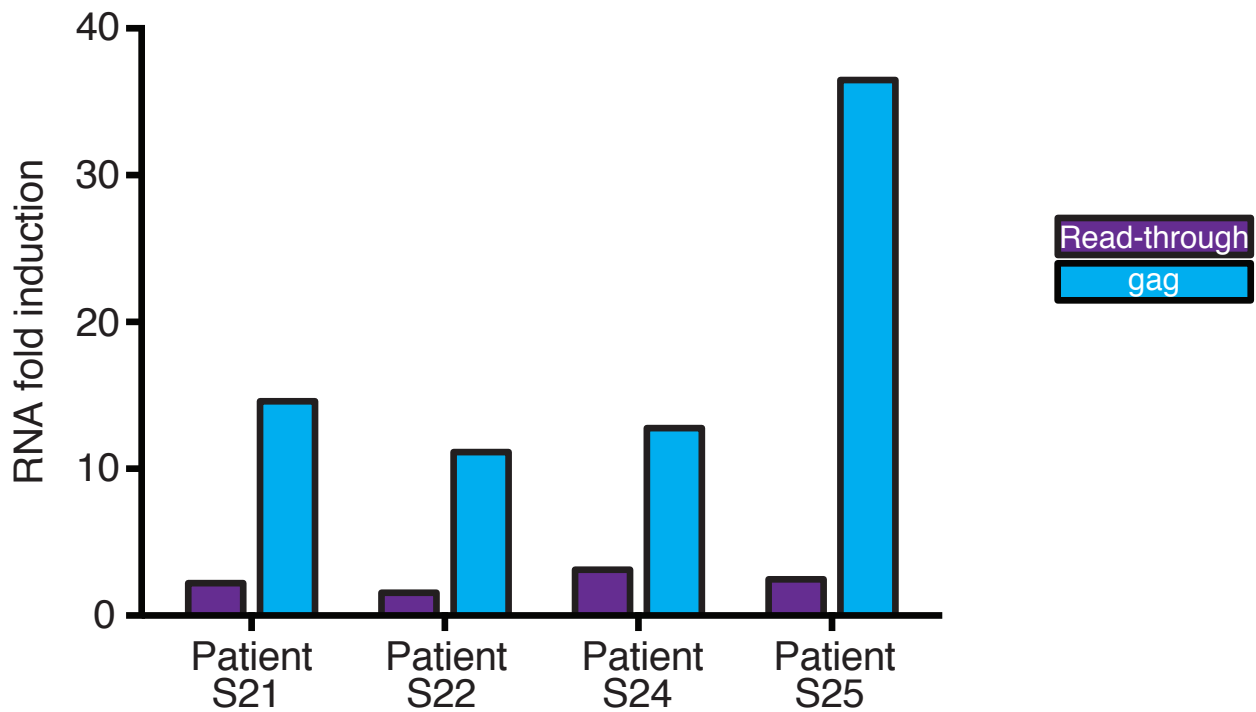

**Supplementary Figure 3. PMA/I induces *bona fide* HIV-1 *gag* transcripts.** Ten million rCD4s from five infected individuals on ART were cultured with DMSO alone or PMA/I for 6 h. DNase-treated intracellular RNA was measured by RT-qPCR. RT(-) controls were negative for all samples. Fold change relative to DMSO control is presented.
